# Supplementary material for: Retrieval of Prefabricated Zirconia Crowns with Er,Cr:YSGG Laser from Primary and Permanent Molars
Source: Preprints.org preprint supplement (doi:10.20944/preprints202010.0007.v1), 2020-10-01
Supplement: Supplementary file 1 [file supplementary]

**Title: Retrieval of ceramic crowns with Er,Cr:YSGG laser from primary and permanent molars**

**Data Source:** Extracted teeth, specifically extracted for non-research purposes

**IRB approval deemed not necessary since it was determined not to be human subjects research based on the following:**

**Activities that Generally Do Not Involve Human Subjects:**

**Data that are obtained by the investigator in a completely anonymous state when the investigator will have no access to the ability to re-identify individuals.**

- See the Research Involving Private Information or Biological Specimens decision chart.

# Research Involving Private Information or Biological Specimens

Are the specimens/data obtained from living individuals?

NO, individuals are NOT living

NOT Human Subjects Research

**YES**, individuals ARE living

Are the specimens/data:

- Human cell lines obtained from a commercial provider (e.g. ATCC); or
- Human cells about which all information has been published; or
- Unidentifiable specimens/data obtained from a commercial provider; or
- Unidentifiable specimens/data obtained from a provider that is prohibited from releasing identifiers by established regulations or policies

**NO**

YES

NOT Human Subjects Research

Were/will the specimens/data (be) collected specifically for the proposed research through an interaction or intervention with living individuals?

**NO**

YES

Human Subjects Research

Can the *recipient* link the specimens/data **directly** to identifiable living individuals?

**NO**

YES

Human Subjects Research

Can the *provider* link the specimens/data, directly or indirectly, to identifiable living individuals?

**NO**

YES

**NOT Human Subjects Research**

Does the *provider* meet the definition of an “investigator” in the recipient’s research?

NO, *provider* is “solely providing”

YES, *provider* is collaborating in recipient’s research

Human Subjects Research

Are the specimens/data provided with a code linking them to identifiable living individuals?

NO

YES

NOT Human Subjects Research

Can the *recipient* readily ascertain the identities of the individuals to whom the specimens/data pertain? Examples of situations in which the recipient **cannot** link the specimens/data to living individuals include:

- the key to decipher the code is destroyed before the research begins; or
- the investigators and the holder of the key to the code enter into an agreement preventing the release of the key to investigators under any circumstances; or
- there are IRB-approved written policies in place preventing the release of the key under any circumstances; or
- there are other legal requirements prohibiting the release of the key under any circumstances.

**NO**

YES

NOT Human Subjects Research

Human Subjects Research
